# Supplementary material
Source: publisher figshare collection journal article supplement (https://gsapubs.figshare.com/ndownloader/files/26669570)
Supplement: Supplementary file 1 [file 26669570]

## Sheet: median+IQR
Supplementary Data 2. Micro-SRS-XRF median and interquartile range (IQR) data of concentrations (μg/cm2) of elements of interest.
Experiment		Cu	Zn	Fe	Ca	P	Ni	Ti	Mn
Matured_Cu_liver	median	36.4	5.4	52	15.06	23.8	2.1	2.2	1.5
	IQR	23.5-47	3.4-6.7	27.6-138.4	3.23-28.16	16.6-33.6	1.7-2.6	1.2-3.5	0.8-2.5
Matured_Cu_skin	median	5.3	6.2	11.5	57.7	41.8	2.3	1.6	1.1
	IQR	1-28.1	2.0-15.3	6.8-22.6	10.0-372.2	16.0-106.2	1.1-4.5	1-2.6	0.54-2.0
Matured_DD_liver	median	1.45629	0.855451	9.79853	8.38748	5.78437	0.226148	0.459791	0.263502
	IQR	0.5-3.6	0.4-1.8	4-28	3.6-21.8	2.8-14.3	0.1-0.4	0.3-0.8	0.15-0.5
Matured_DD_skin	median	0.21	1.45	6	43.5	14	0.4	0.65	0.3
	IQR	0.11-0.34	0.94-2.29	3.8-9.1	5.9-116.0	7.0-37.7	0.2-0.80	0.3-0.9	0.20-0.5
untreated_liver	median	34.4	4.6	203.2	11	92.7	1.44	3.7	3.6
	IQR	21.7-47.6	3.1-6.5	109.3-403.3	6.2-17.4	69.3-120.3	0.7-2.4	2.2-7.9	1.8-7.6
untreated_skin	median	2.56	83.1	5.4	1160.1	191	1.5	4.4	2.3
	IQR	1-3.5	33.1-110.7	1.7-7.4	477.1-1380.7	67.4-245.9	0.3-2.3	1.2-5.8	0.8-3.1

## Sheet: G48696
Rossi, V., Webb, S.M., and McNamara, M., 2021, Maturation experiments reveal bias in the chemistry of fossil melanosomes: Geology, v. 49, https://doi.org/10.1130/G48696.1
